# Supplementary material
Source: MDPI journal article supplement (https://www.mdpi.com/2075-4701/9/5/613)
Supplement: s1 [file s1]

**Supplementary Materials:**

**Figure S1.**

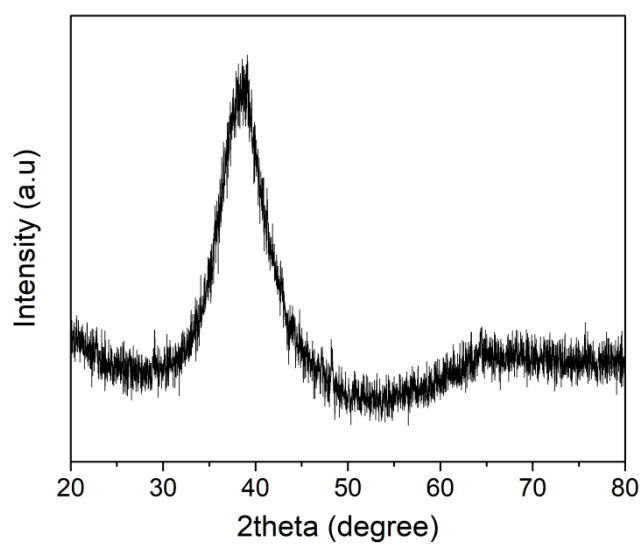

**Figure 1.** The typical XRD pattern of as-cast Zr-Cu-Ag-Al alloy.

Figure S2.

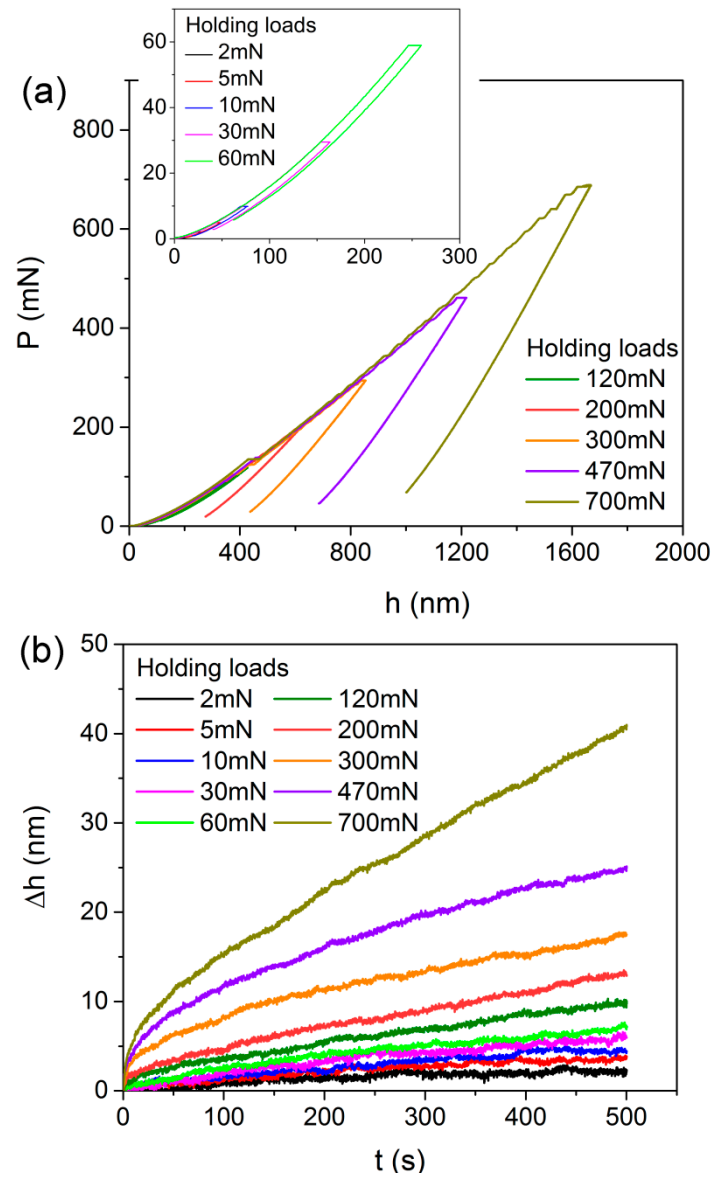

**Figure 2.** (a) The typical creep  $P-h$  curves at various holding depths under spherical indenter.  $P-h$  curves at shallow depths are enlarged in the inset. (b) Creep displacements at various holding loads were plotted with holding time.

Figure S3.

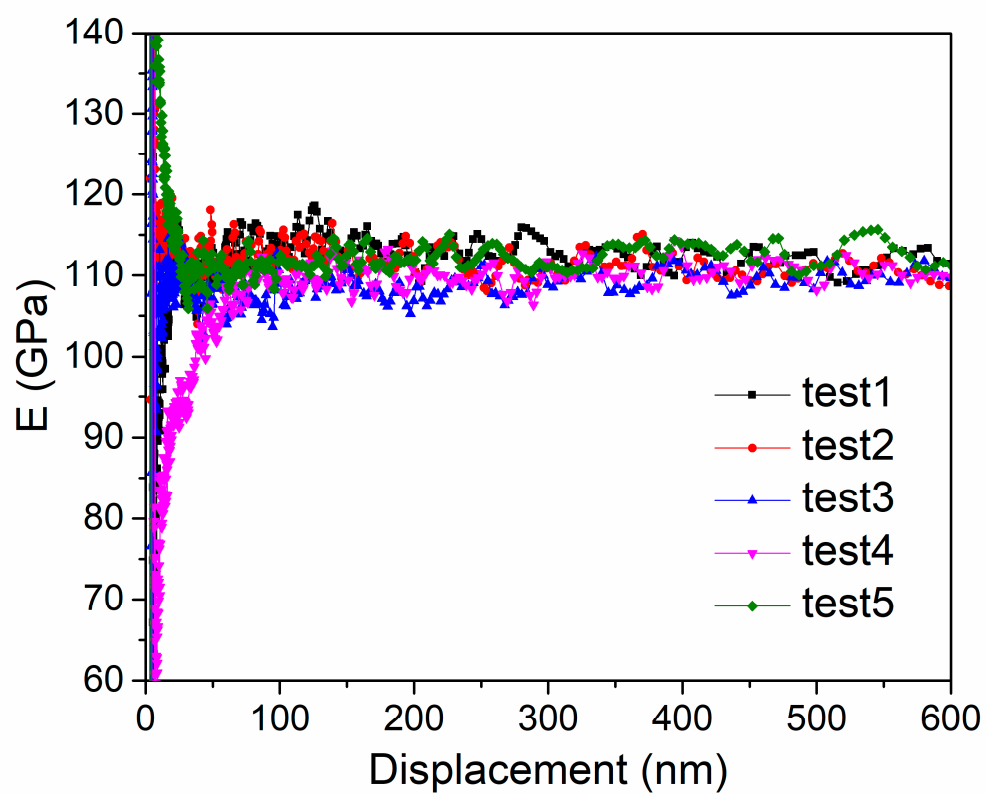

**Figure 3.** Elastic modulus was measured by continuous stiffness module (CSM) and was depicted as a function of displacement. The mean elastic modulus was 110 GPa.
